# Supplementary material for: Influence of ZnWO4 nanorod aspect ratio on the photocatalytic activity
Source: Royal Society of Chemistry journal article supplement (doi:10.1039/c1ce05256j), 2011-01-01
Supplement: c1ce05256j.pdf [file c1ce05256j.pdf]

## Supporting Information

# Influence of ZnWO<sub>4</sub> Nanorod Aspect Ratio on the Photocatalytic Activity

Di Li, Rui Shi, Chengsi Pan, Yongfa Zhu\*

Department of Chemistry, Tsinghua University, Beijing, 100084, China

The concentrations of phenol and most of its reaction intermediates were measured by a HPLC (Agilent 1100) system. A HIQ-SU-C18 reversed phase column was employed. All substances were detected by a UV detector at 269 nm. The eluent consisted of a mixture of water and methanol (40:60 by volume); the flow rate was  $1\text{ ml min}^{-1}$ .

The photocatalytic activities of the  $\text{ZnWO}_4$  were evaluated by the phenol decomposition under ultraviolet irradiation. Ultraviolet light was obtained by a 12 W Hg lamp ( $\lambda = 254\text{ nm}$ , the Institute of Electric Light Sources, Beijing) and the average light intensity was  $1\text{ mW cm}^{-2}$ . The radiant flux was measured with a power meter (the Institute of Electric Light Sources, Beijing).

The photocatalytic degradation of phenol in the aqueous solutions was studied by using  $\text{ZnWO}_4$  as the photocatalyst under room temperature and normal atmosphere pressure.  $\text{ZnWO}_4$  (50mg) and 100ml phenol (10 mg/L) aqueous solution were added into the reactor, and then stirred with a magnetic stirrer prior to irradiation with Hg lamp at room temperature. After the reaction, the sample solution was put in centrifuge to remove  $\text{ZnWO}_4$  nanorods from solution. The solution obtained this way was extracted into a quartz cell. The absorbance of the samples was measured with quartz cells every 5 min.

Fig. 1 showed the degradation of phenol using  $\text{ZnWO}_4$  nanorods obtained at  $220\text{ }^\circ\text{C}$ . The first-order linear relationship was revealed by the plots of the  $\ln(C/C_0)$  vs irradiation time ( $t$ ), where  $C$  was the concentration of phenol at the irradiation time  $t$  and  $C_0$  was the concentration in the adsorption equilibrium of the photocatalysts before irradiation. Via the first order linear fit, the determined reaction-rate constants  $k$  was  $0.0363\text{ min}^{-1}$ . The concentration of phenol was decreased by  $\text{ZnWO}_4$  nanorods. Large numbers of photogenerated  $e^-/h^+$  pairs on the surface of  $\text{ZnWO}_4$  nanorods led to the rapid oxidation of phenol.

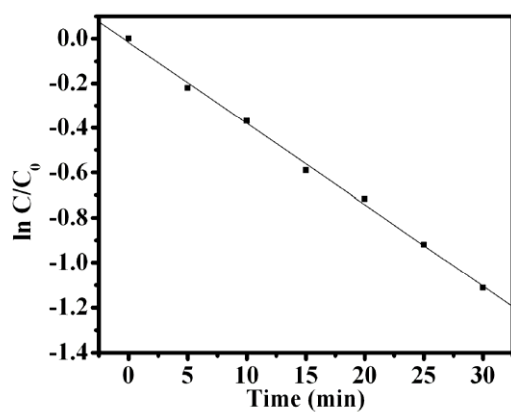

Fig. S1 First-order plots for the photocatalytic degradation of phenol using various  $\text{ZnWO}_4$  sample.
